# Supplementary material for: A Self-Reinforcing Hydrogel Disrupting Osteoclast Sealing Zone for Bone Erosion Alleviation
Source: Research Square preprint supplement (doi:10.21203/rs.3.rs-7827141/v1), 2025-10-16
Supplement: Supplementary file 1 [file 4bb34ed951d8606254578a7d.pdf]

Supplementary Materials for

# **A Self-Reinforcing Hydrogel Disrupting Osteoclast Sealing Zone for Bone Erosion Alleviation**

**Yilin Wei <sup>1</sup>, Bei Kang <sup>1</sup>, Baohong Liu <sup>1</sup>, Wen Li <sup>1</sup>, Yutong Song <sup>1</sup>, Mengyao Zhang <sup>1</sup>, Xinyi Liu <sup>1</sup>, Haobo Wang <sup>1</sup>, Zheyi Li <sup>1</sup>, Nan Li <sup>1\*</sup>**

<sup>1</sup> Tianjin Key Laboratory of Drug Delivery & High-Efficiency, School of Pharmaceutical Science and Technology, Faculty of Medicine, Tianjin University, Tianjin 300072, China.

\*Corresponding author. Email: [linan1985@tju.edu.cn](mailto:linan1985@tju.edu.cn) (N. Li).

This PDF file includes:  
Fig. S1 to S6  
Table S1-S3

## CONTENTS

|                                                                                                                                    |    |
|------------------------------------------------------------------------------------------------------------------------------------|----|
| Supplementary Fig. 1 Characterization of Te and Team.....                                                                          | 3  |
| Supplementary Fig. 2 Preparation and characterization of Team Gel.....                                                             | 4  |
| Supplementary Fig. 3 Cellular biocompatibility and effects of Team Gel .....                                                       | 5  |
| Supplementary Fig. 4 Team Gel-induced transcriptional reprogramming achieved inhibition of osteoclast generation and function..... | 6  |
| Supplementary Fig. 5 ACLT model in male rat knee joints for OA.....                                                                | 7  |
| Supplementary Fig. 6 Histological analysis of major organs.....                                                                    | 8  |
| Table S1. The sequence of primers used in RT-qPCR.....                                                                             | 9  |
| Table S2. OARSI histopathology scoring system template for rat knee OA.....                                                        | 10 |
| Table S3. List of abbreviations.....                                                                                               | 11 |

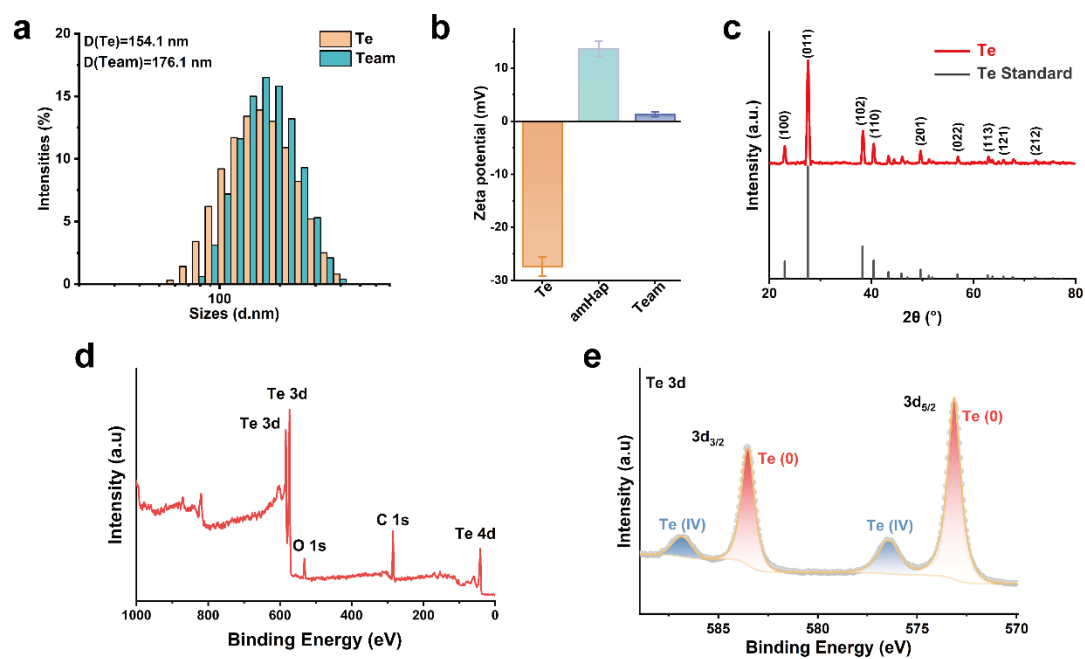

**Supplementary Fig. 1 Characterization of Te and Team.** **a** Particle size distribution of Te and Team. **b** Zeta potential of Te and Team. **c** XRD pattern of Te and XRD pattern of Te (JCPDF No.78-2312). **d** Overall XPS pattern of Te. **e** High-resolution XPS pattern of Te 3d in Te.

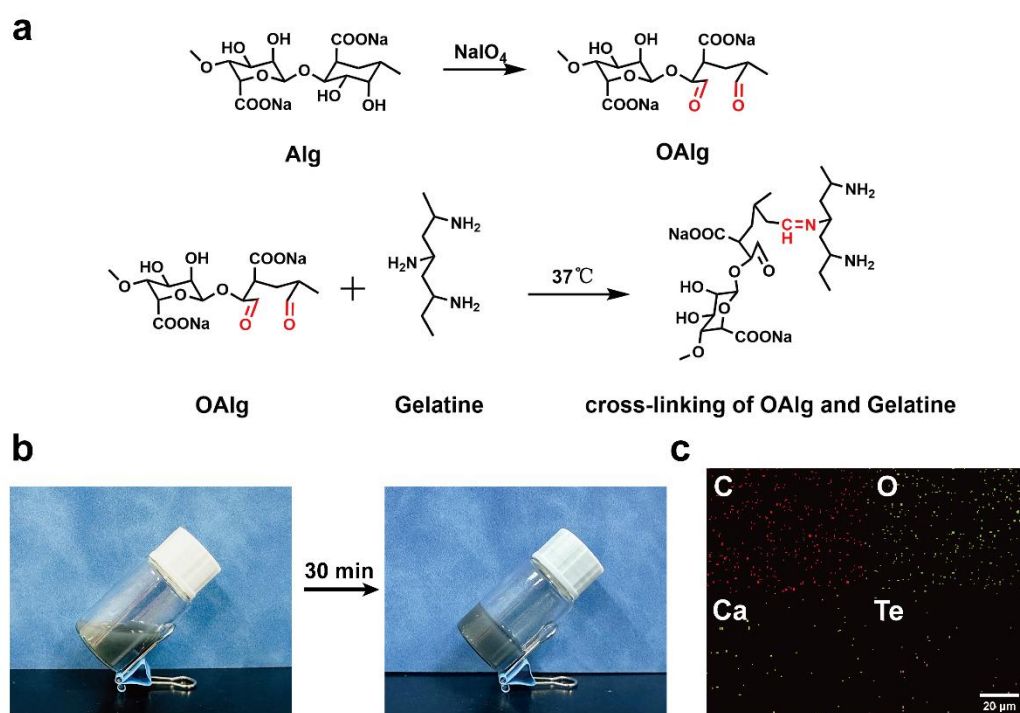

**Supplementary Fig. 2 Preparation and characterization of Team Gel.** **a** Synthetic procedure of Team Gel. **b** Images of Team Gel were captured before and after cross-linking. **c** Elemental mapping of C, O, Ca, and Te in the Team Gel.

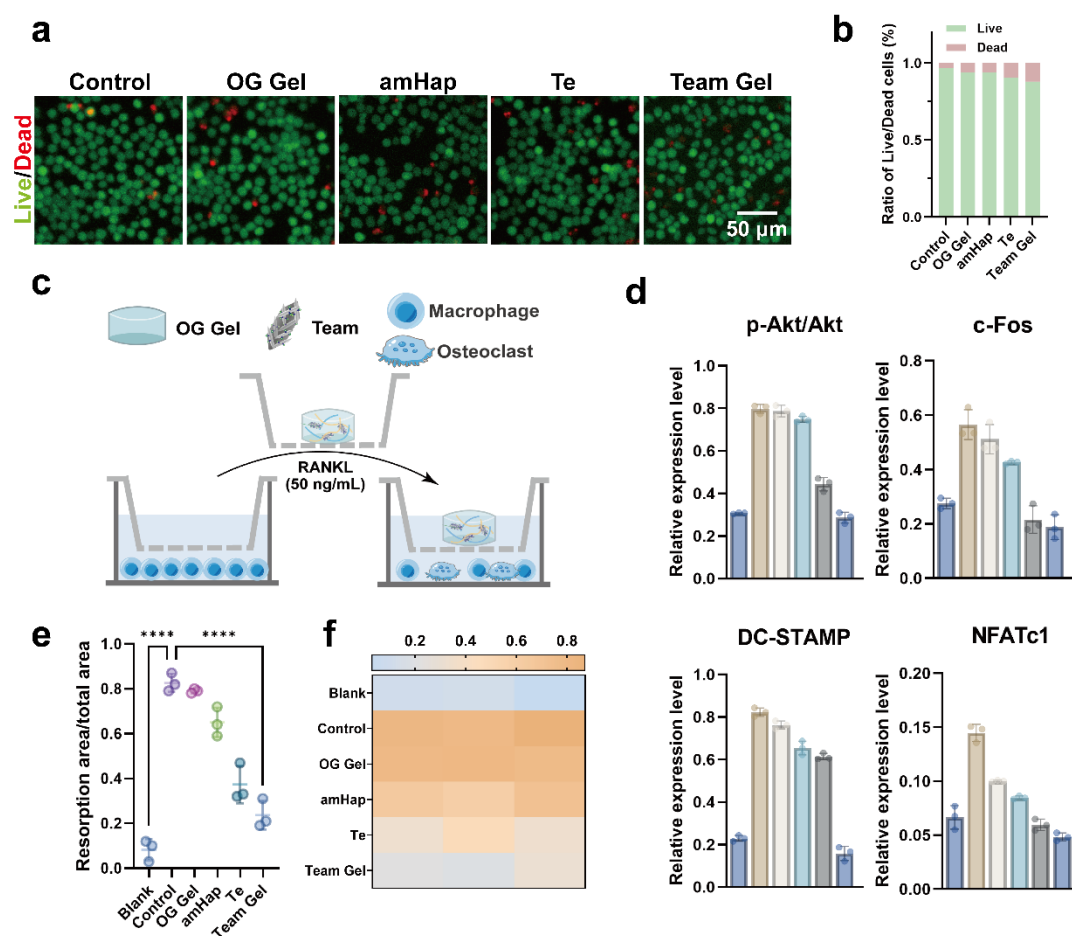

**Supplementary Fig. 3 Cellular biocompatibility and effects of Team Gel.** **a** Fluorescent images and quantitative evaluation of RAW264.7 co-stained by Calcein AM/PI. **b** Green (Calcein AM), live cells; red (PI), dead cells. **c** Schematic of osteoclast precursors in noncontact coculture with hydrogels in a 12-well transwell plate. **d** Western blot analysis of protein levels of Akt, p-Akt, c-Fos, NFATc1 and DC-STAMP in osteoclasts. **e** Quantitative analysis of bone resorption area. **f** Heatmap of quantitative analysis of bone resorption area. Data were presented as the mean  $\pm$  SD (n = 3 independent experiments). \*P < 0.05, \*\*P < 0.01, \*\*\*P < 0.001, and \*\*\*\*P < 0.0001. Statistical comparisons were performed using one-way ANOVA with Tukey's test. Source data are provided as a Source Data file.

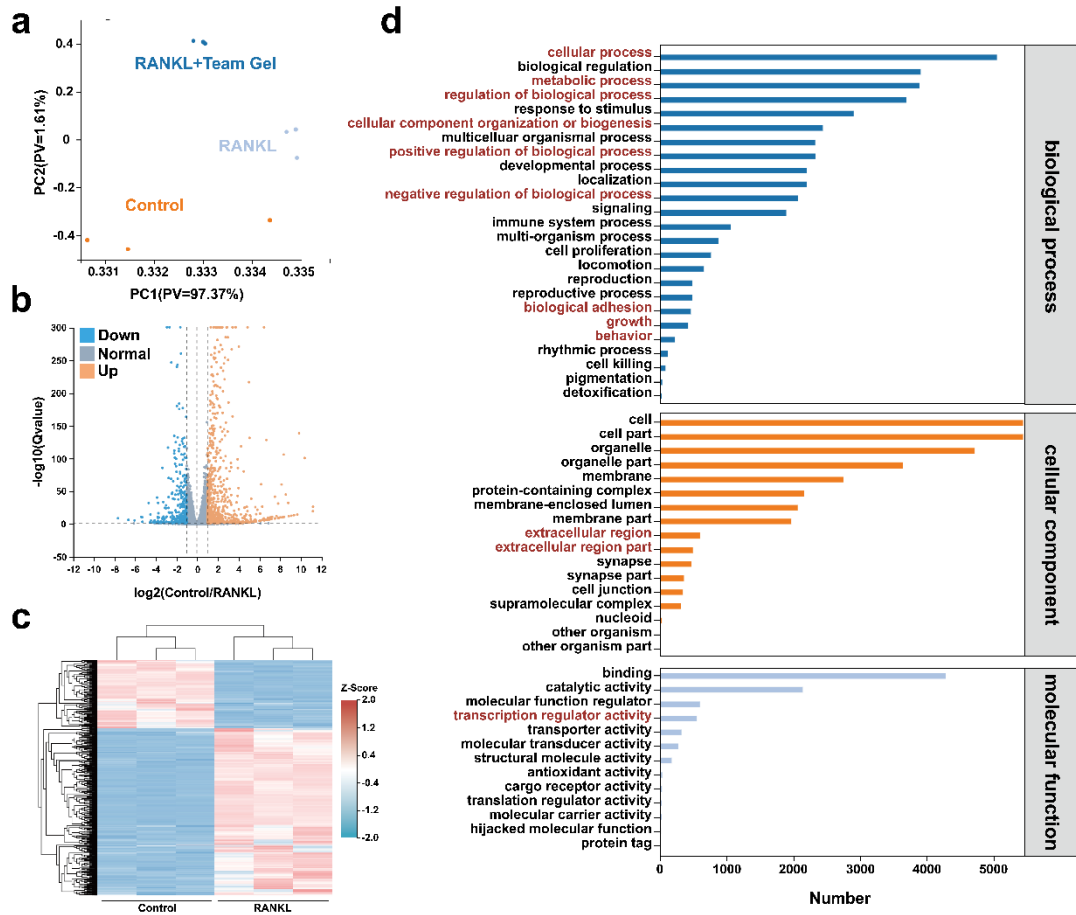

**Supplementary Fig. 4 Team Gel-induced transcriptional reprogramming achieved inhibition of osteoclast generation and function.** **a** PCA of genes in RAW 264.7 (control group) or RANKL-activated RAW 264.7 before treatment (RANKL group) or after treatment with Team Gel (RANKL+ Team Gel group). **b** Volcano plots for the Control versus the RANKL groups comparisons. Upregulated genes are marked orange, and downregulated genes are marked blue. **c** Heatmap showing the hierarchical clustering of the differentially expressed genes in Control and RANKL groups. **d** GO enrichment bar plots of Control and RANKL groups.

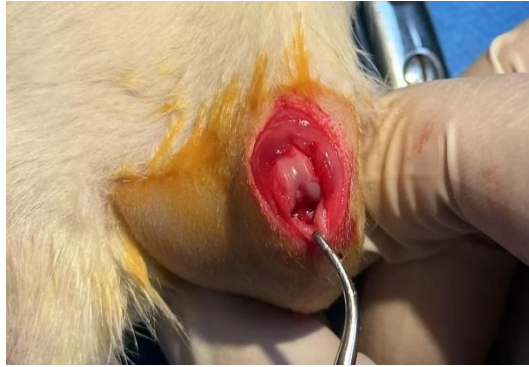

**Supplementary Fig. 5 ACLT model in male rat knee joints for OA.** Images of the male rat OA model with standardized anterior cruciate ligament transection (ACLT) in the left knee joints.

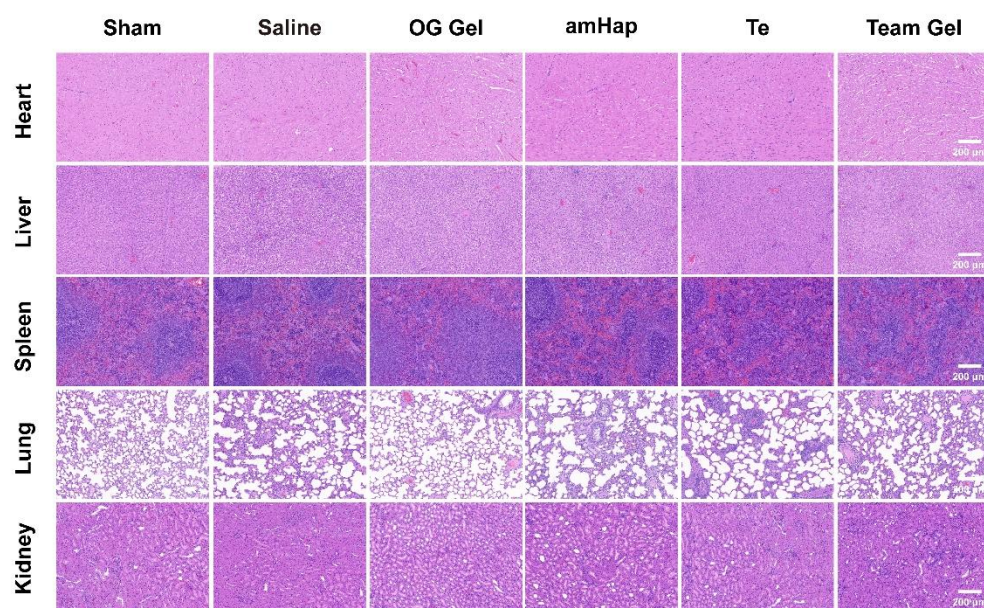

**Supplementary Fig. 6 Histological analysis of major organs.** Representative histological images for major organs, including heart, liver, spleen, lung, and kidney with H&E staining.



**Table S1. The sequence of primers used in RT-qPCR.**

| Gene     | Forward primer (5'-3') | Reverse primer (5'-3') |
|----------|------------------------|------------------------|
| GAPDH    | GCAAGTTCAACGGCACAG     | CCAGTTGGTAACAATGCCATGT |
| C-Fos    | TATTCCGTTCCCTTCGGATT   | GGTGAAGACCGTGTCTCAGGAG |
| NFATc1   | TCTGGACCTGGGTGATGGGG   | GATACGAGGCCTGTGGCACC   |
| DC-STAMP | AAAACCCTTGGGCTGTTCTT   | AATCATGGACGACTCCTTGG   |

**Table S2. OARSI Histopathology Scoring System Template for Rat Knee OA**

| <b>Parameter</b>                | <b>Score Range</b> | <b>Scoring Criteria</b>                                                                                                                                                                                                                                                                                                                            |
|---------------------------------|--------------------|----------------------------------------------------------------------------------------------------------------------------------------------------------------------------------------------------------------------------------------------------------------------------------------------------------------------------------------------------|
| <b>Grade</b> (Depth of lesion)  | <b>0–6</b>         | <p>0 = Normal cartilage surface</p> <p>1 = Surface irregularities (minimal fibrillation)</p> <p>2 = Pannus and superficial fissures</p> <p>3 = Vertical clefts extending into mid-zone</p> <p>4 = Vertical clefts into deep zone</p> <p>5 = Erosion to calcified cartilage</p> <p>6 = Denudation of cartilage, deformation of subchondral bone</p> |
| <b>Stage</b> (Extent of lesion) | <b>0–4</b>         | <p>0 = No involvement</p> <p>1 = &lt;10% of the surface</p> <p>2 = 10–25% of the surface</p> <p>3 = 25–50% of the surface</p> <p>4 = &gt;50% of the surface</p>                                                                                                                                                                                    |
| <b>Score</b> (Grade × Stage)    | <b>0–24</b>        | Multiply Grade and Stage to generate total score per site (e.g., medial tibial plateau)                                                                                                                                                                                                                                                            |

**Table S3. List of abbreviations.**

| Abbreviation                                     | Definition                                  |
|--------------------------------------------------|---------------------------------------------|
| OA                                               | Osteoarthritis                              |
| MMP                                              | Matrix metalloproteinase                    |
| Te                                               | Tellurium                                   |
| NP                                               | Nanoparticle                                |
| am                                               | Amino                                       |
| Hap                                              | Hydroxyapatite                              |
| Ca <sup>2+</sup>                                 | Calcium ion                                 |
| SB                                               | Subchondral bone                            |
| RANKL                                            | Receptor activator of NF- $\kappa$ B ligand |
| Se                                               | Selenium                                    |
| F-actin                                          | Filamentous actin                           |
| PO <sub>4</sub> <sup>3-</sup>                    | Phosphate ion                               |
| H <sub>2</sub> SeO <sub>3</sub>                  | Selenous acid                               |
| TeO <sub>2</sub>                                 | Tellurium dioxide                           |
| Ca(NO <sub>3</sub> ) <sub>2</sub>                | Calcium nitrate                             |
| (NH <sub>4</sub> ) <sub>2</sub> HPO <sub>4</sub> | Ammonium phosphate dibasic                  |
| SDS                                              | Sodium dodecyl sulfate                      |
| TEM                                              | Transmission electron microscopy            |
| DLS                                              | Dynamic light scattering                    |
| SAED                                             | Selected area electron diffraction          |
| XRD                                              | X-ray diffraction                           |
| TeO <sub>3</sub> <sup>2-</sup>                   | Tellurite ion                               |
| H <sub>2</sub> O <sub>2</sub>                    | Hydrogen peroxide                           |
| APTES                                            | $\gamma$ -Aminopropyltriethoxysilane        |
| FTIR                                             | Fourier-transform infrared spectroscopy     |
| FITC                                             | Fluorescein Isothiocyanate                  |

---

|          |                                               |
|----------|-----------------------------------------------|
| OGGel    | Oxidized alginate and gelatin hydrogel        |
| OGTH     | OGGel-TH hydrogel                             |
| OAlg     | Oxidized alginate                             |
| SEM      | Scanning electron microscopy                  |
| G'       | Stable storage modulus                        |
| G''      | Loss modulus                                  |
| CCK8     | Cell Counting Kit-8                           |
| OC       | Osteoclast                                    |
| CTSK     | Cathepsin K                                   |
| ELISA    | Enzyme linked immunosorbent assay             |
| TRAP     | Tartrate - Resistant Acid Phosphatase         |
| ACLT     | Anterior cruciate ligament transection        |
| OARSI    | Osteoarthritis Research Society International |
| DEGs     | Differentially expressed genes                |
| GO       | Gene ontology                                 |
| KEGG     | Kyoto Encyclopedia of Genes and Genomes       |
| Sham     | Sham-operated                                 |
| Micro-CT | Micro-computed tomography                     |
| H&E      | Hematoxylin-eosin                             |
| BMD      | Bone mineral density                          |
| BV       | Bone volume                                   |
| TV       | Tissue volume                                 |
| Tb. N    | Trabecular number                             |
| Tb. Th   | Trabecular thickness                          |
| Tb. Sp   | Trabecular separation/spacing                 |
| SD       | Standard deviation                            |
| PBS      | Phosphate buffered saline                     |
| RT       | Reverse transcription                         |
| PCR      | Polymerase chain reaction                     |

---

---

|        |                                  |
|--------|----------------------------------|
| DMEM   | Dulbecco's modified eagle medium |
| DAPI   | 4',6-diamidino-2-phenylindole    |
| H&E    | Hematoxylin and eosin            |
| IHC    | Immunohistochemical              |
| ECM    | Extracellular matrix             |
| COL2A1 | Collagen Type II Alpha 1 Chain   |
| ANOVA  | One-way analysis of variance     |

---
